# Supplementary material for: Schinus terebinthifolia leaf lectin (SteLL) has anti-infective action and modulates the response of Staphylococcus aureus-infected macrophages
Source: PubMed Central journal article supplement (PMC6890730; doi:10.1038/s41598-019-54616-x), 2019-12-03
Supplement: 41598_2019_54616_MOESM1_ESM.pdf [file 41598_2019_54616_MOESM1_ESM.pdf]

***Schinus terebinthifolia* leaf lectin (SteLL) has anti-infective action and modulates  
the response of *Staphylococcus aureus*-infected macrophages**

Isana Maria de Souza Feitosa Lima<sup>1</sup>, Adrielle Zagnignan<sup>1</sup>, Deivid Martins Santos<sup>1</sup>,  
Hermerson Sousa Maia<sup>1</sup>, Lucas dos Santos Silva<sup>1</sup>, Brenda da Silva Cutrim<sup>1</sup>, Silvamara  
Leite Vieira<sup>1</sup>, Clovis Macêdo Bezerra Filho<sup>2</sup>, Eduardo Martins de Sousa<sup>1</sup>, Thiago  
Henrique Napoleão<sup>2</sup>, Karen Angeliki Krogfelt<sup>3,4</sup>, Anders Løbner-Olesen<sup>5</sup>, Patrícia  
Maria Guedes Paiva<sup>2</sup>, Luís Cláudio Nascimento da Silva<sup>1\*</sup>

<sup>1</sup>Programas de Pós-Graduação, Universidade Ceuma, São Luís, Maranhão, Brazil;

<sup>2</sup>Departamento de Bioquímica, Universidade Federal de Pernambuco, Recife,  
Pernambuco, Brazil;

<sup>3</sup>Department of Viral and Microbial Diagnostics, Statens Serum Institut, Copenhagen,  
Denmark;

<sup>4</sup>Department of Science and Environment, Roskilde University, 4000 Roskilde, Denmark;

<sup>5</sup>Department of Biology, Section for Functional Genomics, University of Copenhagen,  
Copenhagen, Denmark.

\*Corresponding author:

Luís C. N. da Silva

Programa de Pós-Graduação em Biologia Microbiana, Universidade Ceuma

Rua Josué Montello, nº 1, Renascença II, São Luís - MA, CEP 65.075-120

E-mail: [luiscn.silva@ceuma.br](mailto:luiscn.silva@ceuma.br); [luisclaudionsilva@yahoo.com.br](mailto:luisclaudionsilva@yahoo.com.br)

## Supplementary Information

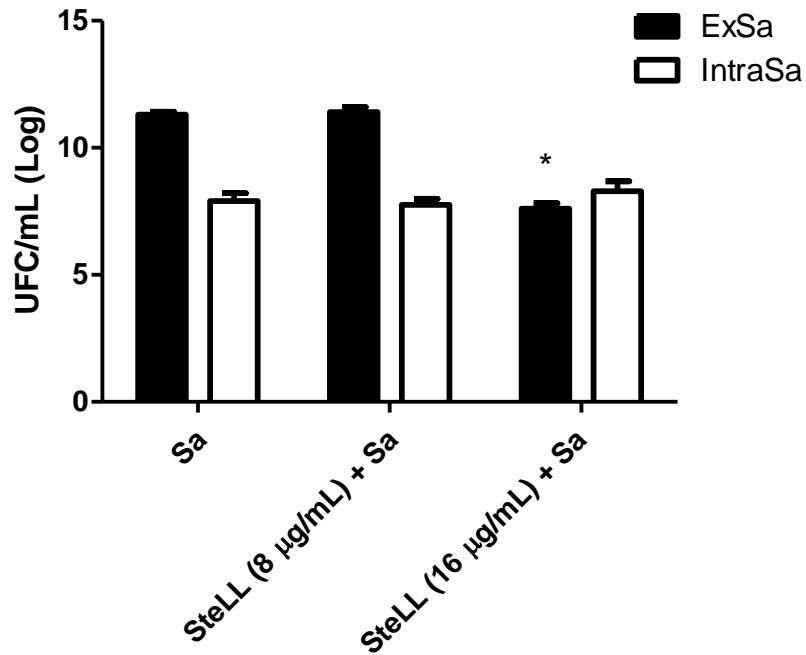

**Supplementary Figure 1:** Effects of SteLL on bactericidal activity of mice peritoneal macrophages towards extracellular and (ExSa) intracellular (IntraSa) *S. aureus* ATCC 6538. M1 macrophages: macrophages treated with LPS + INF- $\gamma$ . M2 macrophages: macrophages treated with IL-4 + IL-13. Con: untreated cells; Sa: *S. aureus*. (\*) Indicates significant differences in relation to *S. aureus*-infected cells without SteLL treatment ( $p < 0.05$ ).
